# Supplementary material
Source: PubMed Central journal article supplement (PMC1820479)

**Supplementary Figure 1.** Generation of *Acc1* null KO mice. **A**, Southern blot analysis of pups from the cross between *Acc1*<sup>lox(ex46)/lox(ex46)</sup> and *Tg*<sup>Ella-cre</sup>. Tail DNA was digested with *Bgl*II and hybridized with probe B. Arrows indicate wild-type (WT; 1.8 Kb) and recombined (KO; 1.4 Kb) alleles. **B**, Genotype analysis embryos at 7.5 dpc from the intercross of *Acc1*<sup>+/-</sup> mice using PCR with primers ACC1-ΔF7 and ACC1-ΔF8. Genotypes are shown on the bottom. Arrows indicate PCR products from wild-type (WT; 578 bp) and recombined (KO; 243 bp) alleles. **C**, Typical morphology of the embryos from the intercross of *Acc1*<sup>+/-</sup> mice. Genotype and stage of each embryo are shown on the top and left of the panels, respectively. **D**, Relative *Acc1* (filled column) and *Acc2* (open column) mRNA level in adult wild-type mouse livers (n = 6) and embryos at 7.5 dpc. Total RNA was prepared from ten embryos at 7.5 dpc. Each column represents the average ± standard error.

Supplementary Figure 1

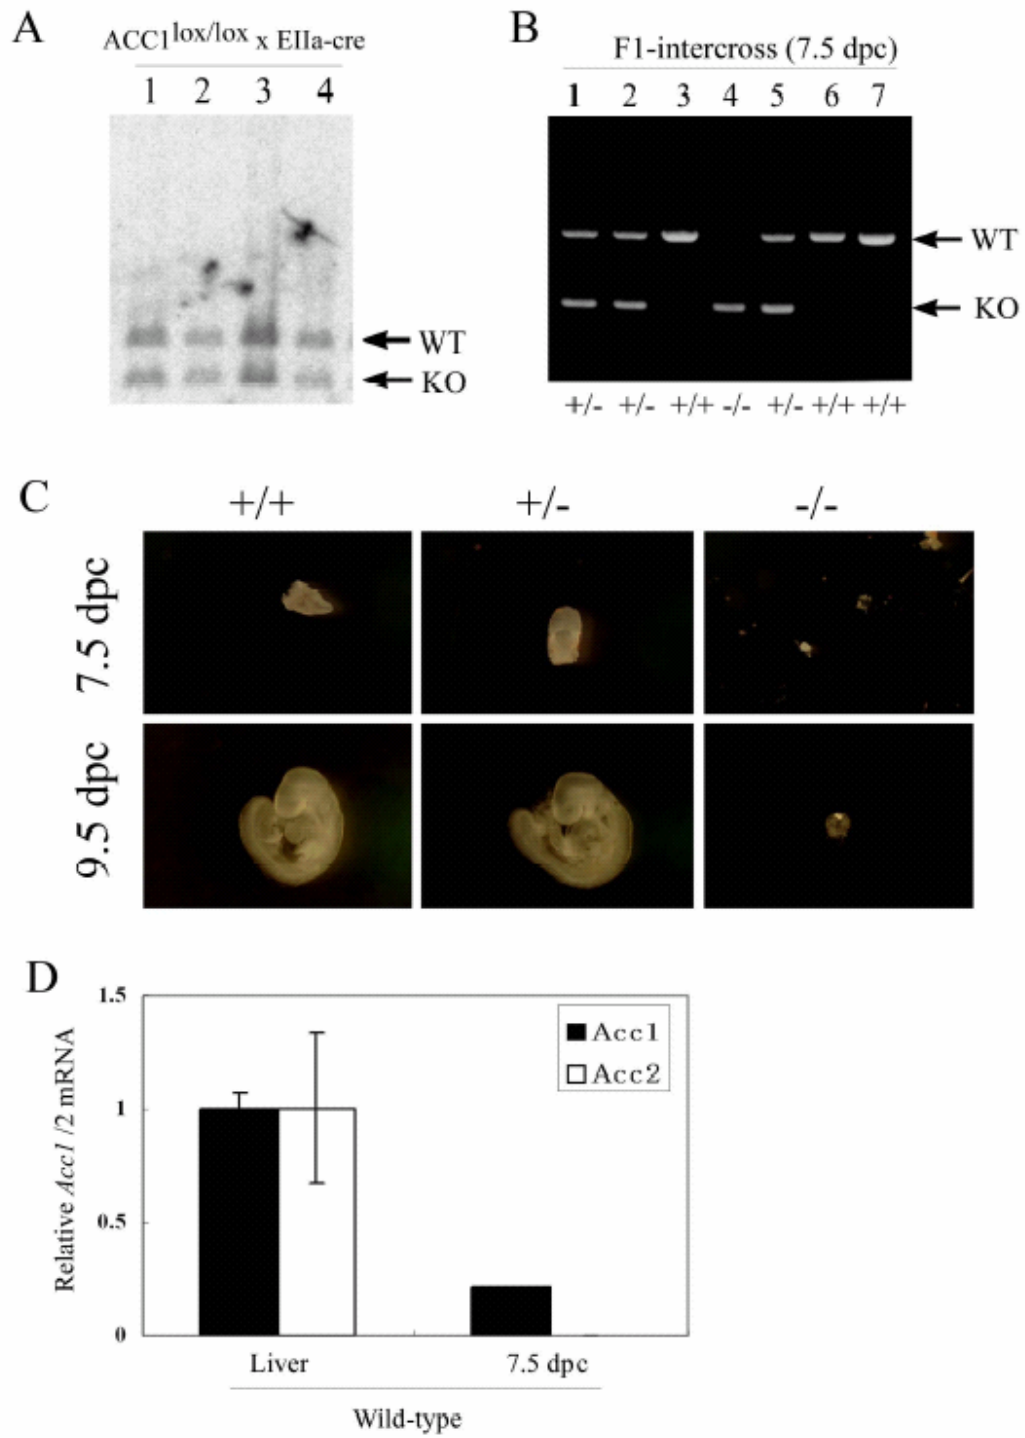

Supplement: molcellb_27_5_1881__1.pdf [file molcellb_27_5_1881__1.pdf]
