# Supplementary material
Source: PubMed Central journal article supplement (PMC1820479)

**Supplementary Figure 2.** Relative amount of *Acc1* mRNA in the various tissues from 7-months old male lox/lox:Fabpl-cre (open column, n=4) and lox/lox:WT (gray column, n=4) mice. The *Acc1* expression level was measured by quantitative real time PCR analysis, normalized with the endogenous  *$\beta$ -actin* mRNA level, and shown as an amount relative to that in the same tissue of wild-type mice. \*\*,  $p < 0.01$  compared with +/+ :WT.

Supplementary Figure 2

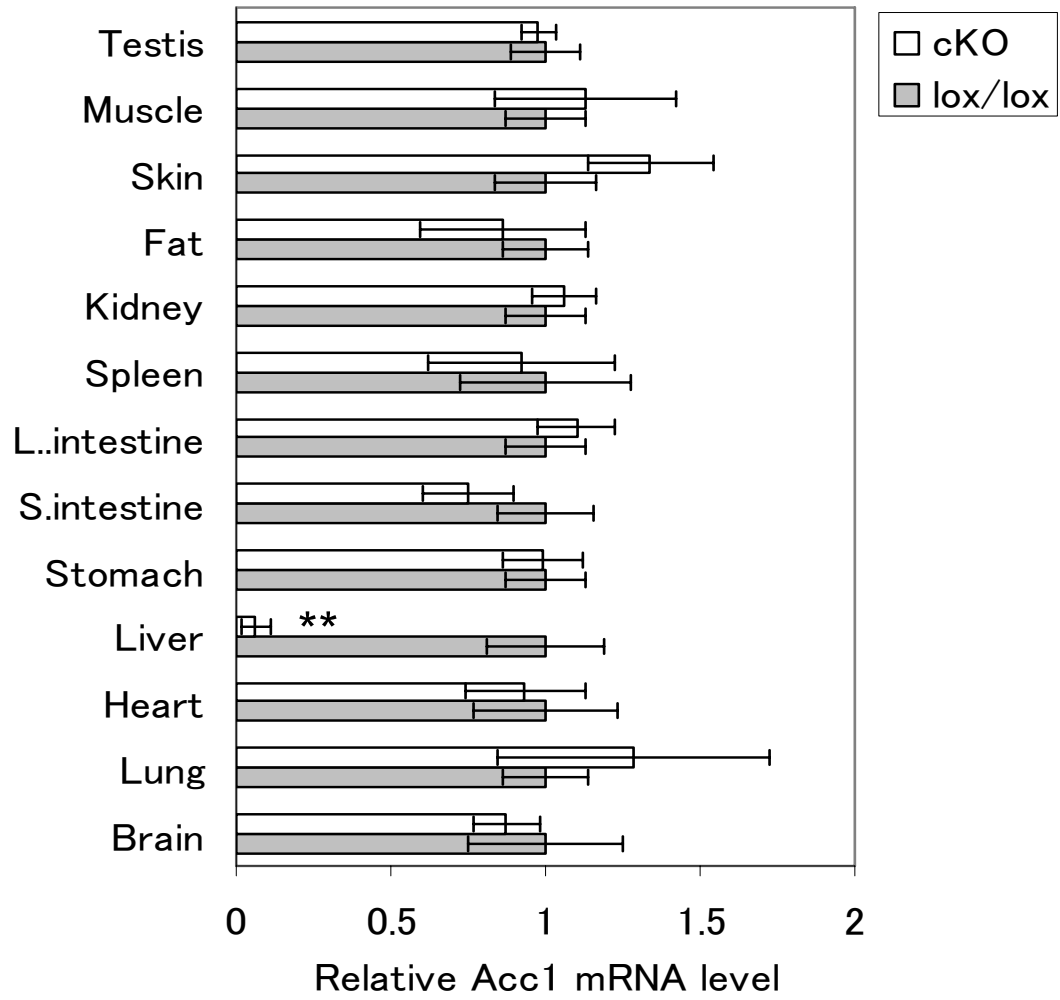

Supplement: molcellb_27_5_1881__2.pdf [file molcellb_27_5_1881__2.pdf]
