# Supplementary material
Source: PubMed Central journal article supplement (PMC1820479)
Supplement: molcellb_27_5_1881__3.pdf [file molcellb_27_5_1881__3.pdf]

**Supplementary Table** Genotype analysis of *Acc1*<sup>+/-</sup> intercross progeny

---

| Age       | No. of litter | Genotype ( <i>Acc1</i> ) |     |                 | total |
|-----------|---------------|--------------------------|-----|-----------------|-------|
|           |               | +/+                      | +/- | -/-             |       |
| 3.5 dpc   | 6             | 10                       | 22  | 8               | 30    |
| 6.5 dpc   | 6             | 8                        | 27  | 11              | 46    |
| 7.5 dpc   | 7             | 14                       | 34  | 7 <sup>A</sup>  | 55    |
| 8.5 dpc   | 4             | 9                        | 15  | 10 <sup>A</sup> | 34    |
| 9.5 dpc   | 3             | 8                        | 7   | 3 <sup>A</sup>  | 18    |
| Live born | 9             | 25                       | 43  | 0               | 68    |

---

*Dpc*, days postcoitum. *A*, Abnormal morphology under a dissection microscope.
